# Supplementary material
Source: Research Square preprint supplement (doi:10.21203/rs.3.rs-9154114/v1)
Supplement: Supplementary file 1 [file ca1575108a996b5acea39d66.xlsx]

## Sheet: Manuscript
Novel QTL on 6H chromosome associated with reduced height, lodging and no yield compromise in barley (Hordeum vulgare)
Hien Minh Vu1, Tristan Coram2, Jason Able1, Julian Taylor1, Stewart Coventry2, and Matthew R. Tucker1*
1 The University of Adelaide, Adelaide, SA, Australia
2 Australian Grain Technologies, Roseworthy, SA, Australia
*Corresponding author. E-mail address: matthew.tucker@adelaide.edu.au

## Sheet: Supplementary Table 1
Supplementary Table S1
Locations and management for the multi-environment field experiments.
Environmenta	Sowing date	Harvest date	Cumulative GDD (oC)b	Growing season rainfall (mm)c	Environment description
RS23	15th May	1st Nov	2253	188.8	Below average rainfall
RS24	27th June	18th Nov	2782	108	Late break, drought stressed
KV23	22nd May	-		204	Reproductive frost damage, not harvested
KV24	13th June	12th Dec	2506	219.4	High rainfall, long season
LC23	20th May	17th Nov	5087	189.2	Below average rainfall
LC24	16th May	11th Nov	4633	220.8	High rainfall
NH23	29th May	10th Nov	2438	172.9	Below average rainfall
NH24	5th June	8th Dec	3557	274	High rainfall, long season
SN23	18th May	24th Oct	2362	84	Hot, low growing season rainfall, stored moisture environment
SN24	20th May	30th Oct	2376	243.4	High rainfall
WT23	18th May	9th Nov	2380	123.9	Below average rainfall
WT24	7th June	20th Nov	2427	137.9	Below average rainfall
aLocations were RS: Roseworthy (34°31’S, 138°41’E); KV: Kaniva (36°26’S, 141°11’E); LC: Lockhart (35°15′S, 146°48′E); NH: Northam (31°26′S, 116°32′E); SN: Sunville (30°17′S, 149°45′E); WT: Winulta (34°15′S, 137°53′E). 23 and 24 stand for trial year 2023 and 2024.
bGrowing degrees day: total temperature (ºC) throughout the growing season (between sowng and harvest date) calculated by averaging daily high and low temperatures and subtracting a base temperature of 0 ºC.
cWeather data for the growing season retrieved from Australian Government Bureau of Meteorology (http://www.bom.gov.au/)

## Sheet: Supplementary Table 2
Supplementary Table S2
QTL identified in populations AGTB-A/AGTB-S and AGTB-A/AGTB-T aligned with consensus map, AGTB-A/ AGTB-T linkage map and affixed with Morex v3 physical positions
Marker	Chromosome	Consensus Map Position (cM)	AGTB-A/AGTB-T Chromosome	AGTB-A/AGTB-T position (cM)	Subset markers	Morex v3 Physical position (base pair)	QTL (using consensus map) from Table 2	Population	QTL (using A/T map) - left marker	QTL (using A/T map) - right marker	Known genes
AGTBSNP-01	1H	52.15	-	-	subset	37459839	QZS.agt.1H.1	1
AGTBSNP-02	1H	85.03	-	-	subset	455481769	QHLC.agt.1H.1	1
AGTBSNP-09	1H	90.29	1H	1.17946	-	463435619			QZS.agt-AT.1H.1
AGTBSNP-03	1H	92.53	1H	1.88044	-	465787874				QZS.agt-AT.1H.1
AGTBSNP-10	1H	101.94	1H	7.06002	subset	477769520			QZS.agt-AT.1H.2
AGTBSNP-04	1H	104.92	1H	9.94249	-	481875882				QDAA.agt-AT.1H.1
AGTBSNP-11	1H	104.92	1H	9.47736	-				QDAA.agt-AT.1H.1	QZS.agt-AT.1H.2
AGTBSNP-05	1H	110.92	1H	13.3646	subset	485161726	QDAA.agt.1H.1	2
AGTBSNP-06	1H	156.52	1H	54.3565	-					QDAA.agt-AT.1H.2
AGTBSNP-07	1H	156.52	1H	54.3565	subset	512806933	QDAA.agt.1H.2, QZS.agt.1H.2	2			HvELF3 (Faure et al. 2012; Huang et al. 2024; Zakhrabekova et al. 2012)
AGTBSNP-08	1H	156.88	1H	54.3565	subset	515749072	QDAA.agt.1H.3, QZS.agt.1H.3	2			HvELF3 (Faure et al. 2012; Huang et al. 2024; Zakhrabekova et al. 2012)
AGTBSNP-12	1H	156.88	1H	54.125	-				QDAA.agt-AT.1H.2
AGTBSNP-13	2H	15.78	-	-	subset	16856232	QHLC.agt.2H.1	1
AGTBSNP-14	2H	103.36	-	-	subset	590052655	QYLD.agt.2H.1	1
AGTBSNP-15	3H	0	3H.1	0	subset	1163603	QDAA.agt.3H.1, QZS.agt.3H.1	2
AGTBSNP-29	3H	0	3H.1	0	subset	1106439			QZS.agt-AT.3H.1
AGTBSNP-30	3H	0.5	3H.1	0.231483	-	1987211			QDAA.agt-AT.3H.1	QZS.agt-AT.3H.1
AGTBSNP-16	3H	1.01	3H.1	0.231483	subset	2406371	QDAA.agt.3H.2	2
AGTBSNP-17	3H	2.11	3H.1	0.462966	-					QDAA.agt-AT.3H.1
AGTBSNP-31	3H	3.26	3H.1	1.40204	-				QDAA.agt-AT.3H.2
AGTBSNP-32	3H	5.39	3H.1	1.63353	subset	7138573			QZS.agt-AT.3H.3	QDAA.agt-AT.3H.2
AGTBSNP-18	3H	13.28	3H.1	7.01131	-					QZS.agt-AT.3H.3
AGTBSNP-33	3H	66.9	3H.3	0	-				QHL.agt-AT.3H.1
AGTBSNP-19	3H	67.4	3H.3	4.26028	-	479514882				QHL.agt-AT.3H.1
AGTBSNP-20	3H	102.54	-	-	subset	548224128	QYLD.agt.3H.2	1
AGTBSNP-21	3H	109.12	-	-	subset	555007769	QHS.agt.3H.1	1
AGTBSNP-22	3H	109.12	-	-	subset	553970611	QYLD.agt.3H.1	1
AGTBSNP-23	3H	115.79	-	-	subset	557113369	QBS.agt.3H.1, QLS.agt.3H.1, QPH.agt.3H.1, QHLC.agt.3H.1, QZS.agt.3H.1, QSN.agt.3H.1	1			sdw1.d (Xu et al. 2017)
AGTBSNP-24	3H	131.1	-	-	subset	557112201	QLS.agt.3H.2	1
AGTBSNP-25	3H	152.9	-	-	subset	581433408	QLS.agt.3H.3	1
AGTBSNP-26	3H	154.08	-	-	subset	579342170	QLS.agt.3H.3	1
AGTBSNP-34	3H	181.26	3H.2	6.54759	-				QLS.agt-AT.3H.2		HvLUX1 (Campoli et al 2013)
AGTBSNP-27	3H	184.5	3H.2	7.48667	-					QLS.agt-AT.3H.2
AGTBSNP-28	3H	197.2	-	-	subset		QBS.agt.3H.2	1
AGTBSNP-35	4H	0	4H.2	0.231483	-					QPH.agt-AT.4H.1
AGTBSNP-39	4H	0.57	4H.2	0	subset	1670170			QPH.agt-AT.4H.1
AGTBSNP-36	4H	1.03	4H.2	0	subset	2247271	QLS.agt.4H.1	1
AGTBSNP-37	4H	74.02	-	-	subset	553639045	QYLD.agt.4H.1	2
AGTBSNP-40	4H	114.86	4H.1	0	-	592287148			QDAA.agt-AT.4H.1
AGTBSNP-38	4H	118.3	4H.1	0.46513	-	590806798				QDAA.agt-AT.4H.1
AGTBSNP-49	5H	45.4	5H.2	0.46513	-	27044279			QYLD.agt-AT.5H.1
AGTBSNP-41	5H	47.11	5H.2	1.16611	subset	30477986				QYLD.agt-AT.5H.1
AGTBSNP-42	5H	49.78	5H.2	14.6932	subset	376602582	QLS.agt.5H.1	2
AGTBSNP-50	5H	49.78	5H.2	14.6932	-				QZS.agt-AT.5H.1
AGTBSNP-51	5H	49.78	5H.2	11.0664	-				QLS.agt-AT.5H.1
AGTBSNP-43	5H	62.88	5H.2	13.9966	-					QLS.agt-AT.5H.1
AGTBSNP-52	5H	63.59	5H.2	14.9247	subset	379450380			QLS.agt-AT.5H.2	QZS.agt-AT.5H.1
AGTBSNP-44	5H	66.26	5H.2	22.6995	subset	411458432				QLS.agt-AT.5H.2
AGTBSNP-45	5H	66.26	5H.2	22.6995	subset	410955097	QLS.agt.5H.2	1
AGTBSNP-46	5H	104.4	-	-	subset	496844644	QLS.agt.5H.3	2
AGTBSNP-47	5H	126.31	-	-	subset	510228242	QHLC.agt.5H.1	1
AGTBSNP-48	5H	210	-	-	subset	572246817	QBS.agt.5H.1	1
AGTBSNP-62	6H	52.22	6H	25.0145	-	68696348			QZS.agt-AT.6H.1, QYLD.agt-AT.6H.1, QPH.agt-AT.6H.1, QLS.agt-AT.6H.2, QBS.agt-AT.6H.1
AGTBSNP-53	6H	53.14	6H	23.3811	-	46072599				QLS.agt-AT.6H.1
AGTBSNP-61	6H	53.14	6H	23.1496	-	46297746			QLS.agt-AT.6H.1
AGTBSNP-70	6H	57.17	6H	31.9486	-				QPH.agt-AT.6H.4, QBS.agt-AT.6H.2	QHL.agt-AT.6H.2
AGTBSNP-54	6H	57.24	6H	27.9447	subset	222172475	QPH.agt.6H.1, QLS.agt.6H.1, QDAA.agt.6H.1, QYLD.agt.6H.1	2
AGTBSNP-63	6H	57.24	6H	27.9447	-	332342483			QDAA.agt-AT.6H.1, QPH.agt-AT.6H.2	QZS.agt-AT.6H.1, QYLD.agt-AT.6H.1, QPH.agt-AT.6H.1, QLS.agt-AT.6H.2, QBS.agt-AT.6H.1
AGTBSNP-64	6H	57.24	6H	29.3669	-	352313312			QPH.agt-AT.6H.3, QS.agt-AT.6H.3, QHL.agt-AT.6H.1, QSN.agt-AT.6H.3	QDAA.agt-AT.6H.1, QPH.agt-AT.6H.2
AGTBSNP-67	6H	57.24	6H	31.0206	-				QLS.agt-AT.6H.5	QLS.agt-AT.6H.4
AGTBSNP-56	6H	57.81	6H	31.4857	-	377127361				QLS.agt-AT.6H.5
AGTBSNP-69	6H	57.81	6H	31.7172	-				QHL.agt-AT.6H.2
AGTBSNP-55	6H	58.38	6H	31.0206	subset	367033080	QPH.agt.6H.2	1
AGTBSNP-57	6H	58.38	6H	35.5356	-					QDAA.agt-AT.6H.2, QHL.agt-AT.6H.3
AGTBSNP-65	6H	58.38	6H	30.7891	subset	366862108	QBS.agt.6H.2, QHLC.agt.6H.1, QLS.agt.6H.2, QSN.agt.6H.1	1, 2	QLS.agt-AT.6H.4	QPH.agt-AT.6H.3, QS.agt-AT.6H.3, QHL.agt-AT.6H.1, QSN.agt-AT.6H.3
AGTBSNP-72	6H	58.38	6H	33.3708	-	377512035			QDAA.agt-AT.6H.2, QHL.agt-AT.6H.3	QPH.agt-AT.6H.4, QBS.agt-AT.6H.2
AGTBSNP-74	6H	58.38	6H	36.0008	-				QLS.agt-AT.6H.6
AGTBSNP-58	6H	59.13	6H	42.5484	-					QLS.agt-AT.6H.6
AGTBSNP-59	6H	59.13	6H	43.7123	subset	401506157	QLS.agt.6H.3	2
AGTBSNP-75	6H	59.13	6H	43.7123	-				QZS.agt-AT.6H.2
AGTBSNP-60	6H	62.02	6H	43.9438	-	408612369				QZS.agt-AT.6H.2
AGTBSNP-76	6H	78.69	6H	80.4134	-				QZS.agt-AT.6H.3
AGTBSNP-82	6H	78.69	-	-	subset	521130618	QLS.agt.6H.4	2
AGTBSNP-77	6H	82.99	6H	88.8253	-	527017021			QDAA.agt-AT.6H.3	QZS.agt-AT.6H.3	HvCO2 (Mulki et al 2015)
AGTBSNP-78	6H	84.16	6H	89.0567	-				QDAA.agt-AT.6H.4	QDAA.agt-AT.6H.3
AGTBSNP-66	6H	84.91	6H	89.7577	subset	527795114				QDAA.agt-AT.6H.4
AGTBSNP-83	6H	84.91	-	-	subset	527813406	QDAA.agt.6H.1	2
AGTBSNP-84	6H	97.02	-	-	subset	536078973	QLS.agt.6H.5	1
AGTBSNP-79	6H	107.8	6H	102.991	-	545235961			QZS.agt-AT.6H.4
AGTBSNP-68	6H	110.04	6H	104.171	-	547297994				QZS.agt-AT.6H.4
AGTBSNP-80	6H	113.78	6H	110.421	subset	550738066			QYLD.agt-AT.6H.2
AGTBSNP-71	6H	117.51	6H	112.586	-	554503349				QYLD.agt-AT.6H.2
AGTBSNP-73	6H	120.34	6H	113.518	-					QHL.agt-AT.6H.4
AGTBSNP-81	6H	120.34	6H	112.817	-				QHL.agt-AT.6H.4
AGTBSNP-85	7H	116.53	-	-	subset	581446566	QBS.agt.7H.1	1
AGTBSNP-86	7H	125.21	-	-	subset	593094581	QHLC.agt.7H.2	1

## Sheet: Supplementary Table 3
Supplementary Table S3
Mean parental values and phenotypic variation of mapping population 1 for agronomic traits assessed in 12 different environments
		Parents		Population
Trait	Environment	AGTB-S	AGTB-A	Mean	Standard deviation	Min	Max	CV	h2	H2
Plant height (cm)	KV23	59.67	72.67	71.26	10.85	42	90	15.23	0.97	0.97
	KV24	61.67	65.33	72.66	10.64	48	92	14.65	0.93	0.94
	LC23	-	-	-	-	-	-	-	-	-
	LC24	59.33	65.33	64.42	11.04	35	83	17.14	0.91	0.92
	NH23	39.67	40.33	43.81	8.21	28	69	18.75	0.63	0.65
	NH24	71	71.67	73.25	9.65	42	90	13.17	0.93	0.94
	RS23	67.67	76.67	72.45	8.91	50	90	12.3	0.91	0.92
	RS24	-	-	-	-	-	-	-	-	-
	SN23	94.67	104.67	101.29	10.52	72	123	10.38	0.95	0.95
	SN24	94.67	94.89	102.73	10.57	66.67	124.67	10.29	0.77	0.79
	WT23	51.67	49.67	56.38	7.96	40	76	14.12	0.86	0.87
	WT24	46.33	55.67	56.28	8.21	37	76	14.59	0.79	0.8
Lodging score	KV23	1	1.67	1.83	1.24	1	8	67.84	0.79	0.8
	KV24	1	1	1.39	0.89	1	6	64.3	0.78	0.78
	LC23	1	1	1.65	1.05	1	7	64.04	0.87	0.88
	LC24	-	-	2.75	0.5	2	3	18.18	-	-
	NH23	1	1	1.01	0.12	1	2	11.75	0.01	0.01
	NH24	1.33	1	2.16	1.46	1	7	67.46	0.92	0.92
	RS23	1.33	1.67	3.15	2.12	1	9	67.25	0.87	0.87
	RS24	-	-	-	-	-	-	-	-	-
	SN23	2.67	5	4.78	1.51	1	8	31.56	0.9	0.91
	SN24	5.67	5.67	5.28	3.11	1	9	58.92	0.88	0.89
	WT23	1	1	1.29	0.69	1	5	53.46	0.7	0.86
	WT24	1	1	2	1.37	1	6	68.54	0.77	0.78
Zadoks score	KV23	50.67	57.33	55.16	3.46	47	60	6.27	0.98	0.98
	KV24	55.33	60.33	59.1	2.32	51	63	3.92	0.95	0.96
	LC23	49.67	57.67	55	4.38	47	65	7.96	0.94	0.94
	LC24	43.67	47.67	45.54	2.52	40	53	5.54	0.92	0.93
	NH23	-	-	-	-	-	-	-	-	-
	NH24	-	-	-	-	-	-	-	-	-
	RS23	-	-	-	-	-	-	-	-	-
	RS24	-	-	-	-	-	-	-	-	-
	SN23	-	-	-	-	-	-	-	-	-
	SN24	-	-	-	-	-	-	-	-	-
	WT23	53.33	55.67	54.81	2.46	49	58	4.49	0.97	0.97
	WT24	49.33	54.33	52.01	2.93	47	58	5.64	0.91	0.91
Yield (kg/ha)	KV23	-	-	-	-	-	-	-	-	-
	KV24	6863.02	6532.17	6519.34	466.24	5090	7940.4	7.15	0.85	0.86
	LC23	7272	6144.17	6399.02	445.9	4696.5	7423.5	6.97	0.92	0.93
	LC24	6472.42	5815.92	6069.37	1010.86	2777.5	7979	16.66	0.55	0.57
	NH23	1904.8	1840.77	1921.84	563.08	744.3	3649.5	29.3	0.3	0.34
	NH24	5234.18	5266.19	4966.91	391.23	4009.67	5930.47	7.88	0.61	0.65
	RS23	4492.27	5211.37	4345.69	572.52	2791.8	5913.5	13.17	0.71	0.75
	RS24	1749.15	1664.65	1931.33	559.6	253.5	3143.4	28.97	0.27	0.29
	SN23	4519.4	4576.67	4206.45	488.84	3030.3	5873.1	11.62	0.87	0.9
	SN24	6700.06	6369.23	5733.42	791.65	2836.84	7775.92	13.81	0.76	0.78
	WT23	4737.57	4340	4526.02	371.8	3172.5	5507.5	8.21	0.45	0.49
	WT24	4903.37	5488.72	4984.16	442.81	3563	5853.5	8.88	0.17	0.21
Head loss counts/ m2	KV23	-	-	-	-	-	-	-	-	-
	KV24	3.22	1.52	2.78	3.48	0	38.07	125.44	0.42	0.52
	LC23	-	-	-	-	-	-	-	-	-
	LC24	-	-	-	-	-	-	-	-	-
	NH23	-	-	-	-	-	-	-	-	-
	NH24	10.42	6.63	6.46	4.89	0	24.43	75.68	0.58	0.58
	RS23	-	-	-	-	-	-	-	-	-
	RS24	15.91	4.36	5.65	4.14	0	22.73	73.31	0.59	0.6
	SN23	-	-	-	-	-	-	-	-	-
	SN24	-	-	-	-	-	-	-	-	-
	WT23	-	-	-	-	-	-	-	-	-
	WT24	2.84	1.7	3.14	2.79	0	19.32	88.81	0.45	0.45
Brackling score	KV23	1	1.33	1.38	0.74	1	4	53.99	0.5	0.5
	KV24	2	1.67	2.93	1.77	1	7	60.5	0.9	0.91
	LC23	-	-	-	-	-	-	-	-	-
	LC24	-	-	-	-	-	-	-	-	-
	NH23	-	-	-	-	-	-	-	-	-
	NH24	-	-	-	-	-	-	-	-	-
	RS23	1.33	1.33	2.01	1.38	1	7	68.49	0.73	0.74
	RS24	-	-	-	-	-	-	-	-	-
	SN23	2	1	1.44	0.7	1	4	49.11	0.4	0.4
	SN24	-	-	-	-	-	-	-	-	-
	WT23	-	-	-	-	-	-	-	-	-
	WT24	-	-	-	-	-	-	-	-	-
Days to awn emergence	KV23	-	-	-	-	-	-	-	-	-
	KV24	-	-	-	-	-	-	-	-	-
	LC23	-	-	-	-	-	-	-	-	-
	LC24	-	-	-	-	-	-	-	-	-
	NH23	-	-	-	-	-	-	-	-	-
	NH24	-	-	-	-	-	-	-	-	-
	RS23	109.67	104.67	106.32	3.37	98	114	3.17	0.9	0.93
	RS24	82.33	81	82.53	1.77	80	88	2.14	0.73	0.78
	SN23	-	-	-	-	-	-	-	-	-
	SN24	-	-	-	-	-	-	-	-	-
	WT23	-	-	-	-	-	-	-	-	-
	WT24	-	-	-	-	-	-	-	-	-

## Sheet: Supplementary Table 4
Supplementary Table S4
Mean parental values and phenotypic variation of mapping population 2 for agronomic traits assessed in nine different environments
		Parents		Population
Trait	Environment	AGTB-T	AGTB-A	Mean	Standard deviation	Min	Max	CV	h2	H2
Plant height (cm)	KV23	77.34	70.5	74.94	6.37	56.67	88.67	8.5	0.82	0.82
	KV24	80.5	74	77.82	6.76	60	94	8.69	0.88	0.89
	LC24	70	67	70.68	5.8	58	84	8.2	0.75	0.77
	NH24	84	73.5	78.14	4.61	66	90	5.9	0.87	0.88
	RS23	78	82.5	79.06	5.71	62	92	7.22	0.67	0.67
	RS24	-	-	-	-	-	-	-	-	-
	SN24	112.17	101.17	105.58	6.9	81.67	117.67	6.53	0.73	0.73
	WT23	65.83	56.83	60.44	6.06	45.33	76.33	10.03	0.82	0.82
	WT24	60.5	51	55.4	5.54	41	71	10.01	0.79	0.8
Lodging score	KV23	3.5	1	2.05	1.36	1	7	66.39	0.8	0.81
	KV24	1.5	1	1.54	0.9	1	6	58.83	0.82	0.83
	LC24	-	-	-	-	-	-	-	-	-
	NH24	2.5	1	1.91	1.12	1	6	58.63	0.8	0.8
	RS23	1.5	4	2.31	1.32	1	8	57	0.67	0.67
	RS24	-	-	-	-	-	-	-	-	-
	SN24	8	5.5	5.67	2.1	1	9	37.1	0.72	0.72
	WT23	1	1	1.15	0.46	1	3	40.07	0.5	0.5
	WT24	1.5	1	1.87	1.22	1	7	65.26	0.77	0.78
Zadoks score	KV23	52	58	54.88	2.07	48	60	3.77	0.94	0.94
	KV24	-	-	-	-	-	-	-	-	-
	LC24	45	50	45.84	1.33	43	49	2.9	0.96	0.96
	NH24	-	-	-	-	-	-	-	-	-
	RS23	-	-	-	-	-	-	-	-	-
	RS24	-	-	-	-	-	-	-	-	-
	SN24	-	-	-	-	-	-	-	-	-
	WT23	52	56	54.4	1.68	49	57	3.08	0.91	0.91
	WT24	48.5	56	50.36	1.92	47	58	3.82	0.91	0.91
Yield (kg/ha)	KV23	-	-	-	-	-	-	-	-	-
	KV24	6489.75	6973.3	6547.66	454.95	2850.4	7456.85	6.95	0.89	0.9
	LC24	7259.38	6741.75	7077.5	765.22	4873.25	8913.25	10.81	0.59	0.59
	NH24	5294.2	4862.02	5025.22	389.3	3793.58	5906.46	7.75	0.72	0.73
	RS23	4759.15	5153.62	4566.27	433.81	3079.45	5649.9	9.5	0.76	0.76
	RS24	2086.9	2010.55	1832.95	800.47	101.8	3410.3	43.67	0.59	0.59
	SN24	3970.02	5236.05	4814.95	564.42	3055.66	6369.23	11.72	0.85	0.85
	WT23	4797.32	4657.35	4704.9	433.12	2672.25	5522.65	9.21	0.54	0.54
	WT24	5319.05	4402.85	4803.96	478.71	3232.15	5726.25	9.96	0.17	0.21
Head loss counts/ m2	KV23	-	-	-	-	-	-	-	-	-
	KV24	1.42	5.97	3.26	3.22	0	23.3	98.95	0.71	0.71
	LC24	-	-	-	-	-	-	-	-	-
	NH24	8.52	3.69	5.93	4.73	0	26.14	79.85	0.47	0.47
	RS23	3.41	2.27	3.23	2.85	0	16.47	88.36	0.67	0.67
	RS24	1.99	2.84	3.61	2.66	0	14.77	73.71	0.46	0.46
	SN24	-	-	-	-	-	-	-	-	-
	WT23	-	-	-	-	-	-	-	-	-
	WT24	3.41	2.27	4.73	3.31	0	23.86	69.87	0.45	0.45
Brackling score	KV23	1	1.5	1.14	0.4	1	3	35.53	0.35	0.35
	KV24	5	2.5	3.18	1.44	1	7	45.32	0.85	0.85
	LC24	-	-	-	-	-	-	-	-	-
	NH24	-	-	-	-	-	-	-	-	-
	RS23	-	-	-	-	-	-	-	-	-
	RS24	-	-	-	-	-	-	-	-	-
	SN24	-	-	-	-	-	-	-	-	-
	WT23	-	-	-	-	-	-	-	-	-
	WT24	-	-	-	-	-	-	-	-	-
Days to awn appearance	KV23	-	-	-	-	-	-	-	-	-
	KV24	-	-	-	-	-	-	-	-	-
	LC24	-	-	-	-	-	-	-	-	-
	NH24	-	-	-	-	-	-	-	-	-
	RS23	108.5	104.5	107.05	2.13	101	112	1.99	0.89	0.89
	RS24	87	81.5	83.08	1.55	80	88	1.86	0.86	0.86
	SN24	-	-	-	-	-	-	-	-	-
	WT23	-	-	-	-	-	-	-	-	-
	WT24	-	-	-	-	-	-	-	-	-

## Sheet: Supplementary Table 5
Supplementary Table S5
Haplotype anaysis of 2 plant height QTL using markers with the least missing values within the co-located flanking markers
AA	Parent T allele
BB	Parent A allele
a. Using A/T Linkage map
	QPH.agt-AT.6H.1		QPH.agt-AT.6H.4
	QTL6H.1		QTL6H.2 (?)
	AGTBSNP-62	AGTBSNP-54	AGTSNP-70	AGTSNP-72
	6H	6H	6H	6H		Environment Cluster 1**			Environment Cluster 2**
A/T Position (cM)	25.0145	27.9447	31.9486	33.3708	Frequency*	PH	SE	group	PH	SE	group
Hap_1	AA	AA	AA	AA	44	65.51	1.58	a	79.13	1.37	a
Hap_2	BB	BB	AA	AA	3	61.76	2.21	ab	76.92	1.72	a
Hap_3	AA	AA	BB	BB	2	63.17	2.31	ab	77.46	1.77	a
Hap_4	BB	BB	BB	BB	69	59.98	1.57	b	73.18	1.36	b
* Lines with heterozygous alleles were excluded
** Environmental Cluster 1: RS23, WT23; Environment Cluster 2: KV23, KV24, NH24, LC24, RS24, SN24, WT24
b. After addition of new HvGA2ox9 KASP markers
	QTL6H.1		QTL6H.2
	AGTBSNP-62	AGTBSNP-54	AGTSNP-72	chr6H_Rht_Exon1_1	chr6H_Rht_Exon1_2
	6H	6H	6H	6H	6H
A/T Position (cM)	25.0145	27.9447	33.3708	-	-		Environment Cluster 1**			Environment Cluster 2**
Adjusted position (cM)*	25.2651	27.6824	45.3891	45.6206	46.8001	Frequency*	PH	SE	group	PH	SE	group
Hap_1	AA	AA	AA	AA	AA	60	65.31	1.55	a	78.91	1.34	a
Hap_2	BB	BB	AA	AA	AA	3	61.75	2.19	ab	76.98	1.69	a
Hap_3	AA	AA	BB	BB	BB	7	62.03	1.78	ab	76.55	1.49	a
Hap_4	BB	BB	BB	BB	BB	62	59.74	1.57	b	72.86	1.34	b
* Adjusted linkage position using A/T map after adding the new markers
** Environmental Cluster 1: RS23, WT23; Environment Cluster 2: KV23, KV24, NH24, LC24, RS24, SN24, WT24
